# Supplementary material for: Completing the hierarchy of rotational defects in monolayer MoS 2 through symmetry-aware evolutionary search
Source: Royal Society of Chemistry journal article supplement (doi:10.1039/d5cp03121d), 2025-12-18
Supplement: d5cp03121d1.pdf [file d5cp03121d1.pdf]

# Supplementary material for „Completing the Hierarchy of Rotational Defects in Monolayer MoS<sub>2</sub> through Symmetry-Aware Evolutionary Search“

Alexander Adel , Ralf Wanzenböck  and Georg K. H. Madsen\* 

Institute of Materials Chemistry – TU Wien, Austria

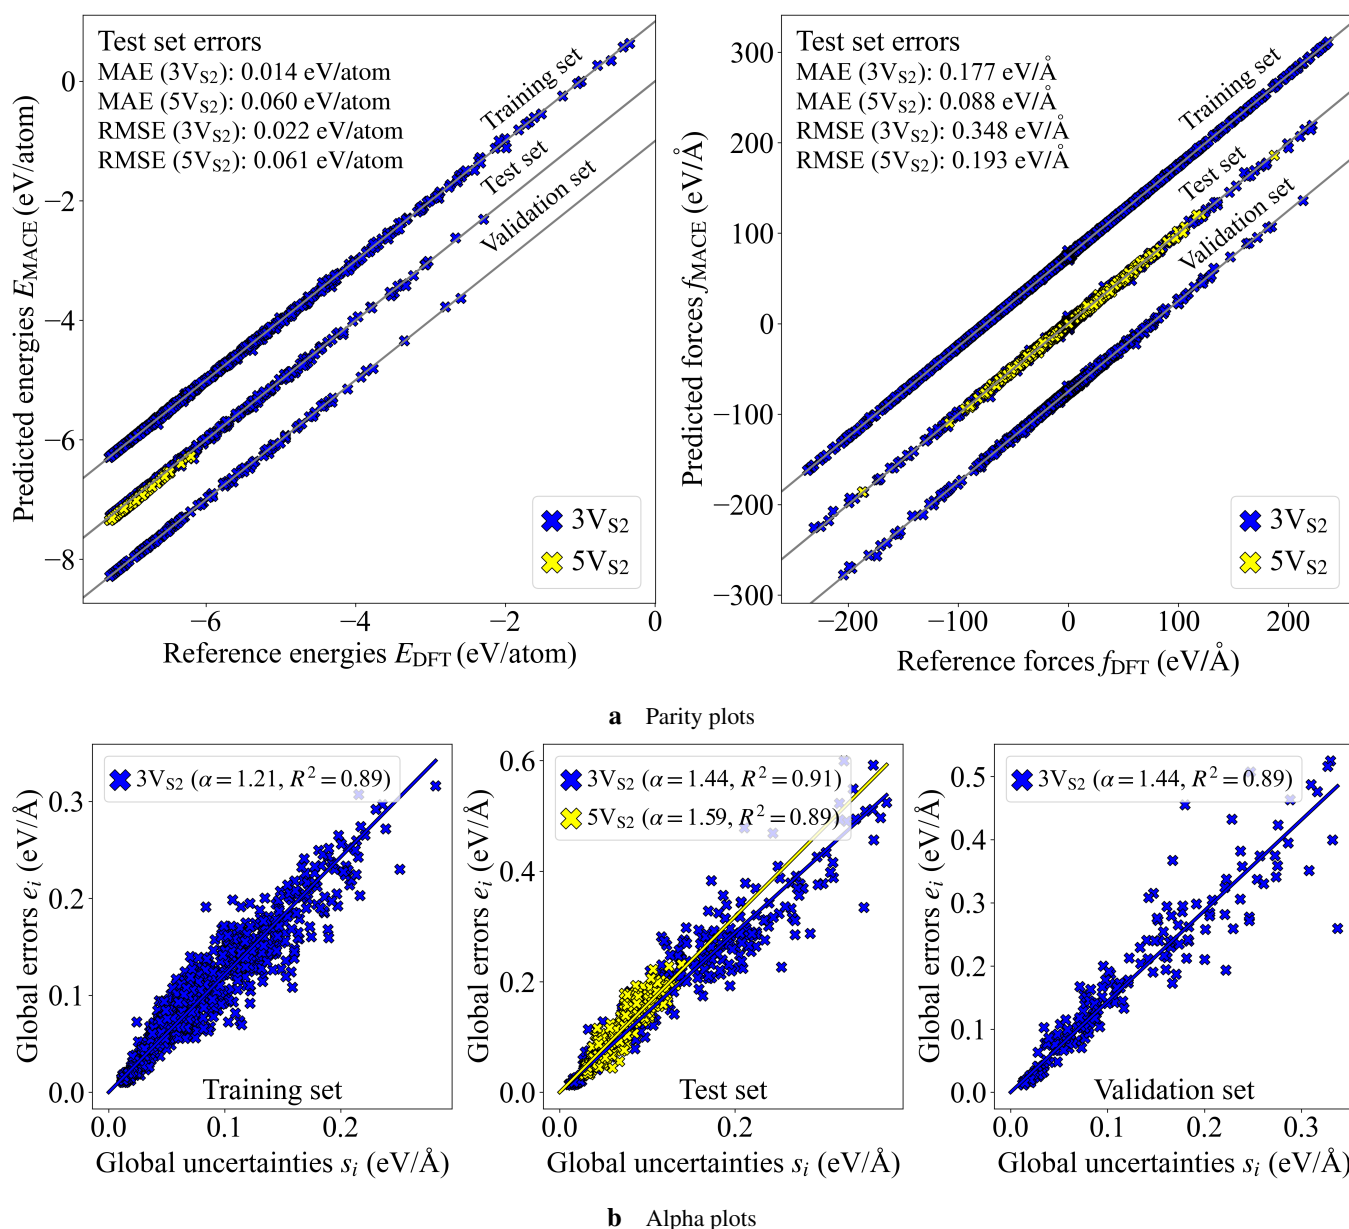

Figure S1 – Parity and alpha plots before one active learning step (iteration 0).

\*E-mail: [georg.madsen@tuwien.ac.at](mailto:georg.madsen@tuwien.ac.at)



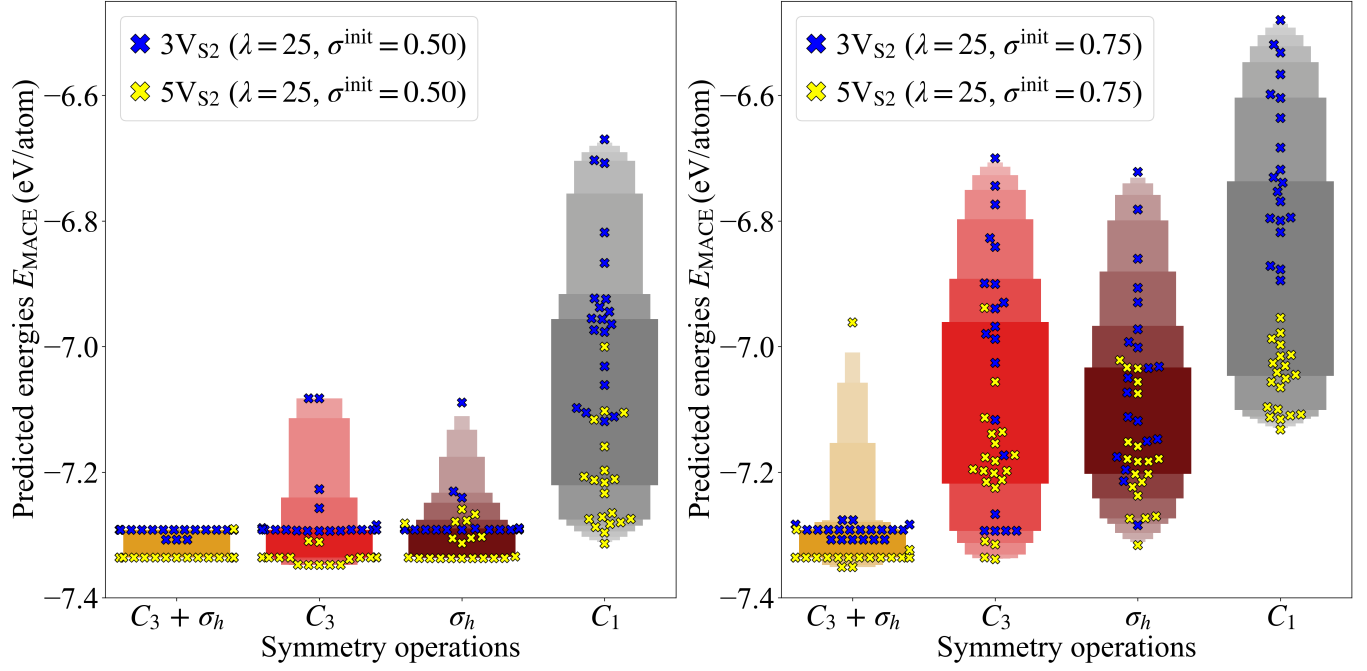

a Population size of 25 individuals

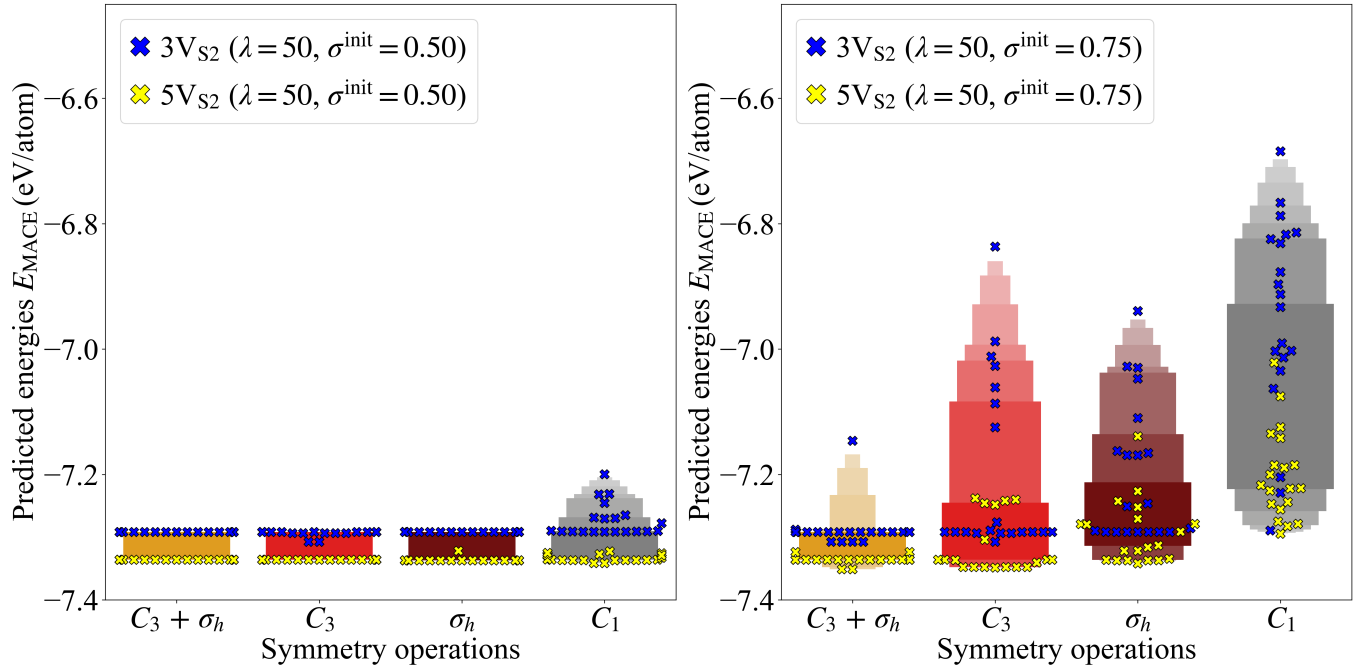

b Population size of 50 individuals

Figure S3 – Predicted energy per atom distributions for all symmetry operations.

**Table S1** – DFT calculations of the most stable final symmetry-class structures from the CLINAMEN2 evolutions shown in Fig. 5. **(Upper table)** The MACE and DFT energy differences between the lowest energy and the second lowest energy structures of a given evolution. **(Lower table)** The MACE and DFT energy differences between the lowest energy structures of different symmetries restrictions are given.

| Symmetry         |                 |                 | Defect           | $\Delta E_{\text{MACE}}$ (eV/atom) | $\Delta E_{\text{DFT}}$ (eV/atom) |
|------------------|-----------------|-----------------|------------------|------------------------------------|-----------------------------------|
| $C_3 + \sigma_h$ | 1 <sup>st</sup> | 2 <sup>nd</sup> | 3V <sub>S2</sub> | 0.016                              | 0.013                             |
|                  |                 |                 | 5V <sub>S2</sub> | 0.015                              | 0.020                             |
| $C_3$            | 1 <sup>st</sup> | 2 <sup>nd</sup> | 3V <sub>S2</sub> | 0.027                              | 0.102                             |
|                  |                 |                 | 5V <sub>S2</sub> | 0.024                              | 0.038                             |
| $\sigma_h$       | 1 <sup>st</sup> | 2 <sup>nd</sup> | 3V <sub>S2</sub> | 0.070                              | 0.072                             |
|                  |                 |                 | 5V <sub>S2</sub> | 0.042                              | 0.039                             |

  

| Defect           |                  |            | $\Delta E_{\text{MACE}}$ (eV/atom) | $\Delta E_{\text{DFT}}$ (eV/atom) |
|------------------|------------------|------------|------------------------------------|-----------------------------------|
| 3V <sub>S2</sub> | $C_3 + \sigma_h$ | $C_3$      | 0.014                              | 0.041                             |
|                  |                  | $\sigma_h$ | 0.023                              | 0.017                             |
| 5V <sub>S2</sub> | $C_3 + \sigma_h$ | $C_3$      | 0.013                              | 0.018                             |
|                  |                  | $\sigma_h$ | 0.035                              | 0.033                             |



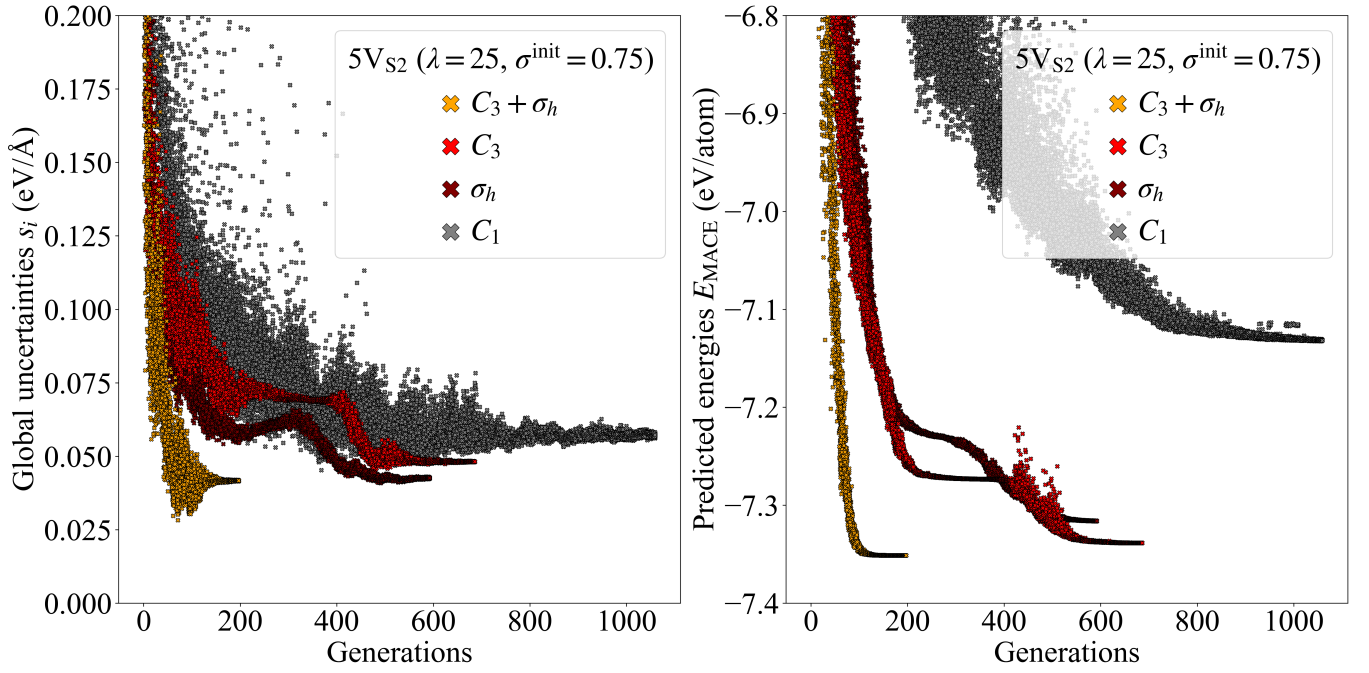

**a** Selected global uncertainties and predicted energies plotted over generations

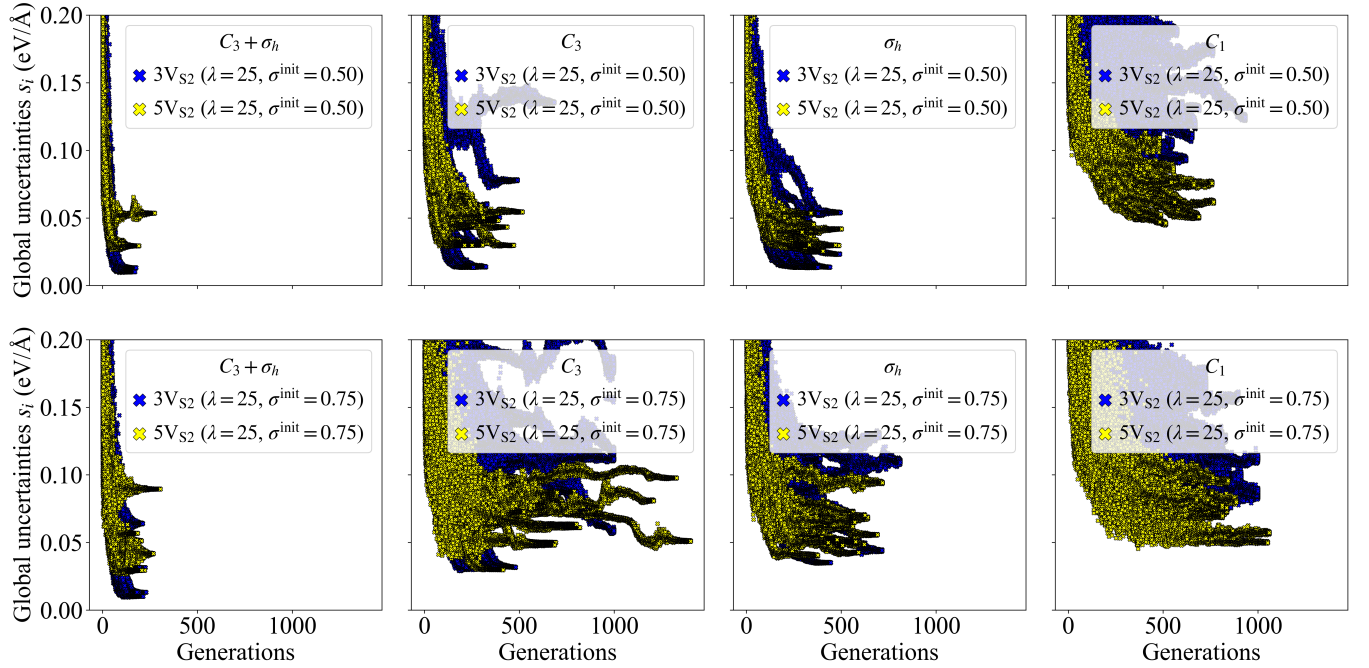

**b** Global uncertainties plotted over generations

**Figure S4 – Global uncertainties and predicted energies plotted over generations.**

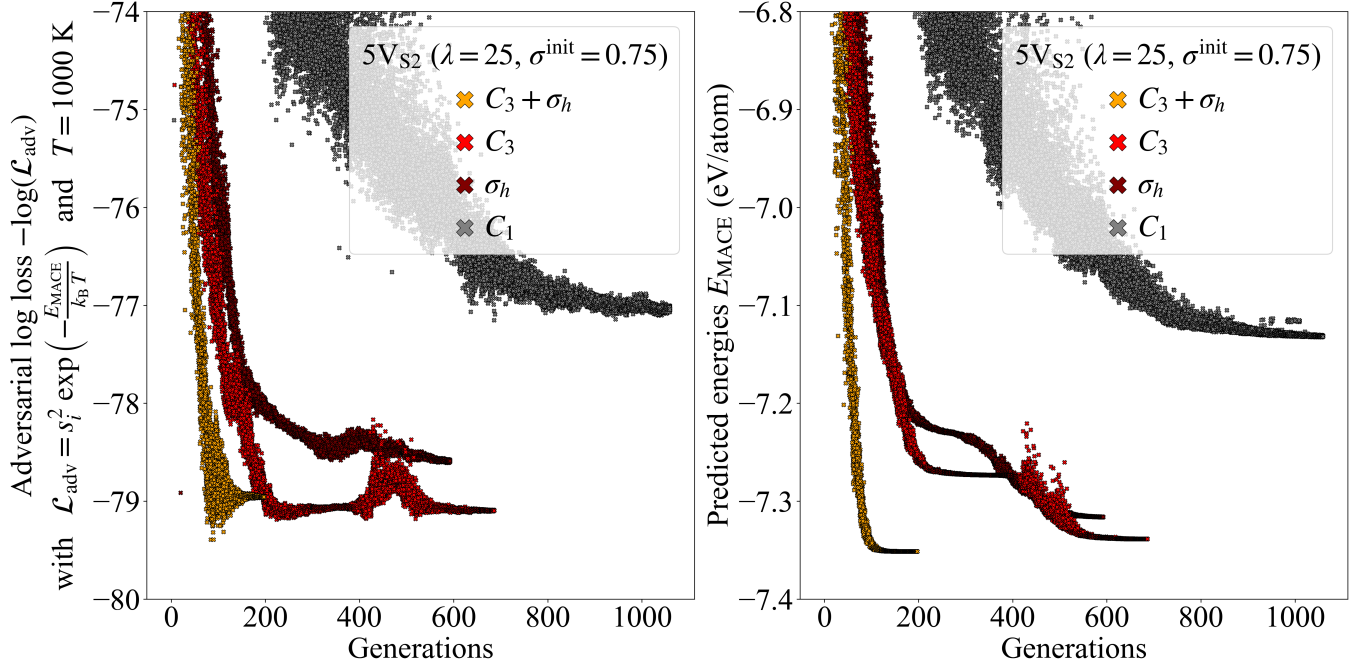

**a** Selected adversarial log loss and predicted energies plotted over generations

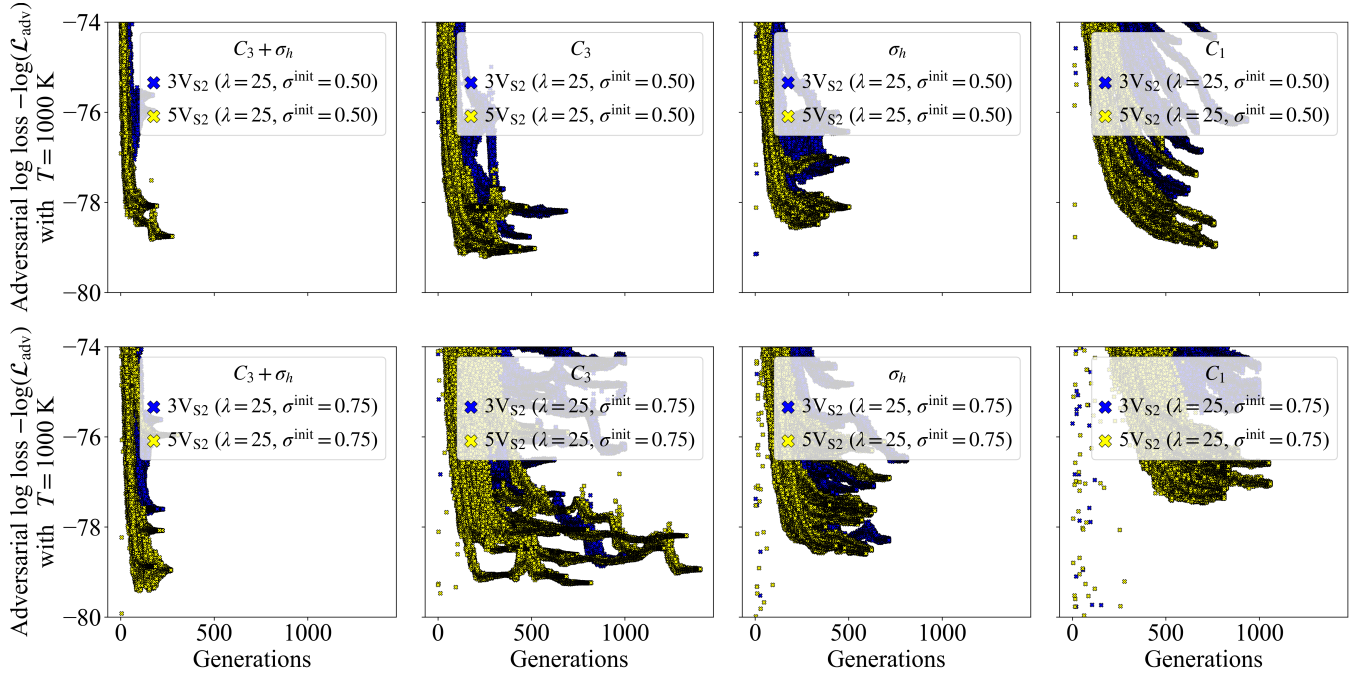

**b** Adversarial log loss plotted over generations

**Figure S5 – Adversarial log loss and predicted energies plotted over generations.**

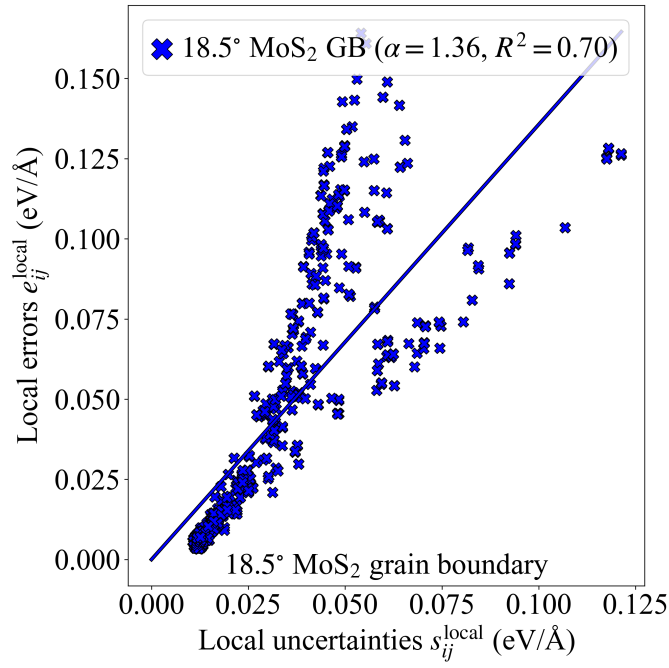

**Figure S6** – Alpha correlation plot of the 18.5° MoS<sub>2</sub> monolayer grain boundary structure. Shown are the relations between the local uncertainties  $s_{ij}^{\text{local}}$  and the local errors  $e_{ij}^{\text{local}}$  (differences between DFT and MACE forces) for every atom. The cutoff radius for the summation over neighboring atoms was chosen as  $r_{\text{cut}} = 4.0 \text{ \AA}$  for both quantities.
